# Supplementary material
Source: PubMed Central journal article supplement (PMC5899640)
Supplement: NIHMS939867-supplement-1.pdf [file NIHMS939867-supplement-1.pdf]

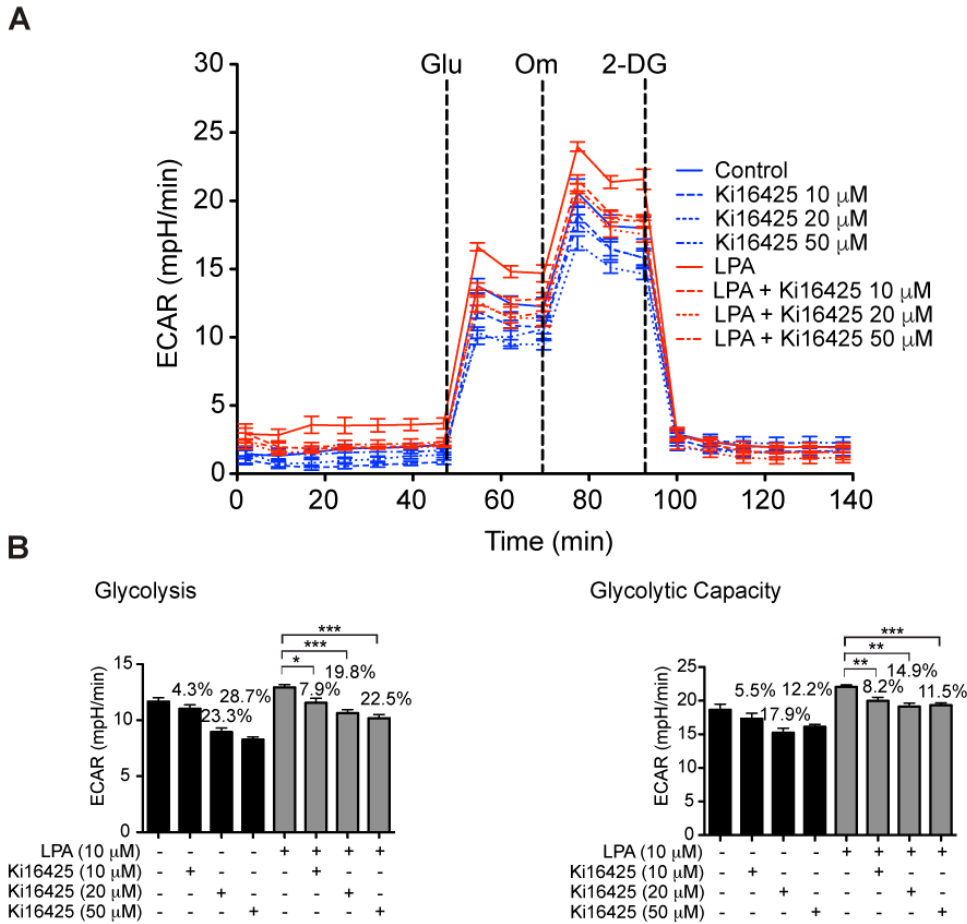

**Supplemental Figure S1. LPA-induced glycolysis is mediated through its cognate receptors.** TOV112D cells were pretreated with different concentration of Ki16425 for 1 hr, following which the cells were stimulated with LPA for 6 hrs. ECAR response to Glucose (Glu, 10 mM), Oligomycin (Om, 1 μM), and 2-DG (50 mM) was determined using XFe96 Seahorse analyzer. ECAR flux was plotted (A). Glycolytic rate and glycolytic capacity derived from the results are presented as bar graphs. Percentile change over the basal level is denoted over the bars of the chart (B). The experiment was repeated at least thrice and the results are from a representative experiment. Mean and SEM (n =11 to 12 parallel determinations) are shown along with the statistical significance, determined by Student's t test (\*P<0.05, \*\*P<0.005, \*\*\*P<0.0005). Results indicate that the glycolytic response to LPA is through the cell surface LPA-receptors (LPARs) since Ki16425, an antagonist for LPAR1, LPAR2, and LPAR3 inhibits LPA-induced glycolytic rate (B, Left Panel) and glycolytic capacity (B, Right Panel) of TOV112D ovarian cancer cells. Percentile changes over the basal levels of glycolysis and glycolytic capacity are denoted above the bars of the chart.
