# Supplementary material
Source: PubMed Central journal article supplement (PMC5899640)
Supplement: NIHMS939867-supplement-2.pdf [file NIHMS939867-supplement-2.pdf]

**A**

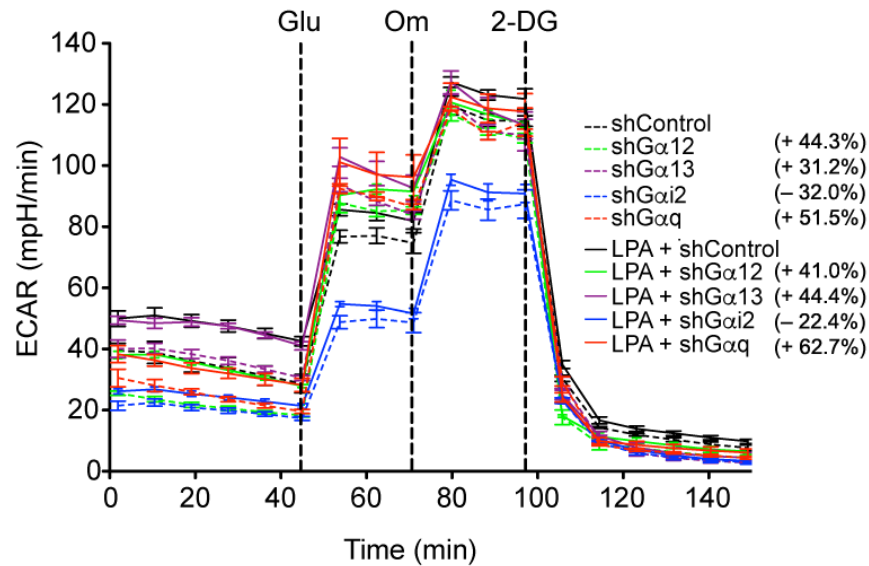

**B**

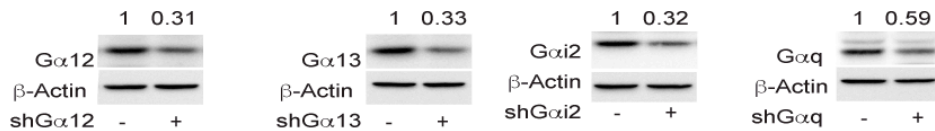

**Supplemental Figure 2. LPA-induced aerobic glycolysis is mediated by Gai2.** pCDNA3-SKOV3-ip control cells stably expressing scrambled shRNA control or SKOV3-ip cells stably expressing shRNAs targeting Gα12 (shGα12), Gα13 (shGα13), Gai2 (shGai2) or Gαq (shGαq) were serum starved overnight after which they were stimulated with LPA (10 μM) for 6 h. ECAR analyses were carried out and the results from a typical experiment from three repeat analyses. Each error bar represents mean ± SEM from 3 - 4 independent parallel measurements. Percentile change over the basal level is denoted in parenthesis. of the chart (A). Lysates from these were subjected to immunoblot analysis using antibodies to respective α-subunits to monitor silencing efficiency (B). Immunoreactive bands of the respective proteins were quantified and the fold decrease over the control cells is presented over the respective bands. Results show that the aerobic glycolysis stimulated by LPA is mediated by Gai2 since only the silencing of Gai2, but not other α-subunits, abrogated the LPA-induced aerobic glycolysis. Silencing efficiency was monitored by immunoblot analysis using the antibodies to specific α-subunits and subsequent quantification of the immunoreactive bands. Quantified expression values demonstrating the efficiency of silencing are presented above the respective Gα-bands (B).
