# Supplementary material
Source: PubMed Central journal article supplement (PMC5899640)
Supplement: NIHMS939867-supplement-3.pdf [file NIHMS939867-supplement-3.pdf]

**A****NSC23766**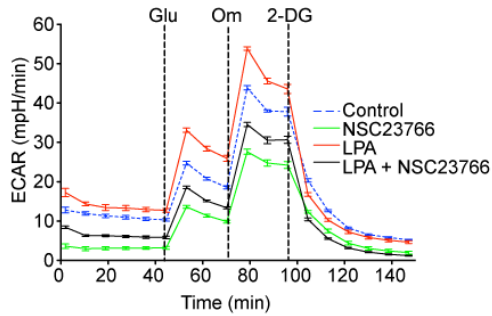**Glycolysis**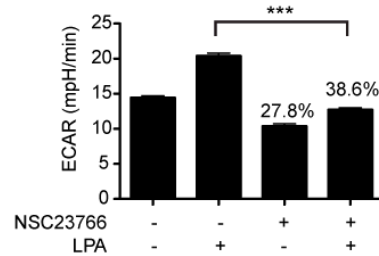**B****Apocynin**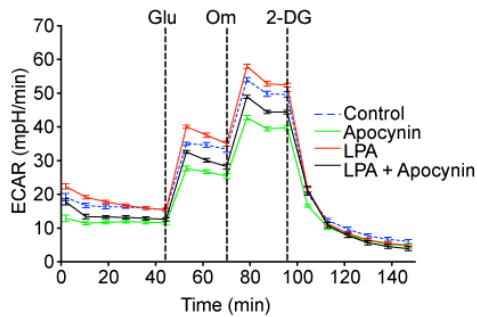**Glycolysis**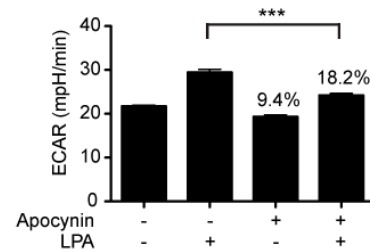**C****NAC**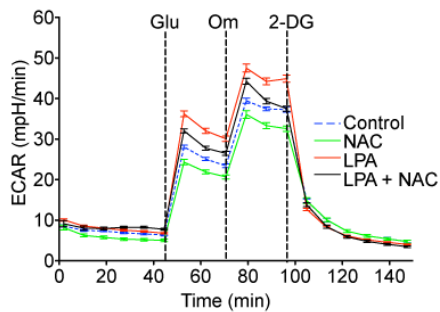**Glycolysis**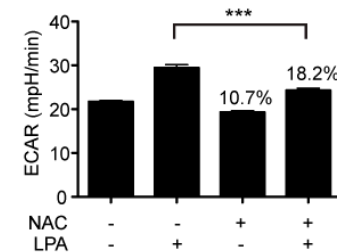

**Supplemental Figure 3. Regulation of aerobic glycolysis by LPA involving the Rac1-NOX-ROS network.** SKOV3-ip cells were pretreated with inhibitors for Rac1 (NSC23766, 10  $\mu$ M), NOX (Apocynin, 100  $\mu$ M), or ROS-scavenger (N-acetyl cysteine, 10  $\mu$ M) for 1 hr, following which they were stimulated with LPA (10  $\mu$ M) for 6 hrs. ECAR flux analysis of the respective cells were carried out. ECAR flux over time and glycolytic rate were plotted. Percentile decrease over the basal level is denoted over the bars of the chart. The results are from a representative analysis ( $n = 3$ ). Error bars represent mean and SEM ( $n = 9$  parallel determinations). Statistical significance was determined by Student's t test (\*\*\*)  $P < 0.0005$ .
