# Supplementary material
Source: PubMed Central journal article supplement (PMC5899640)
Supplement: NIHMS939867-supplement-4.pdf [file NIHMS939867-supplement-4.pdf]

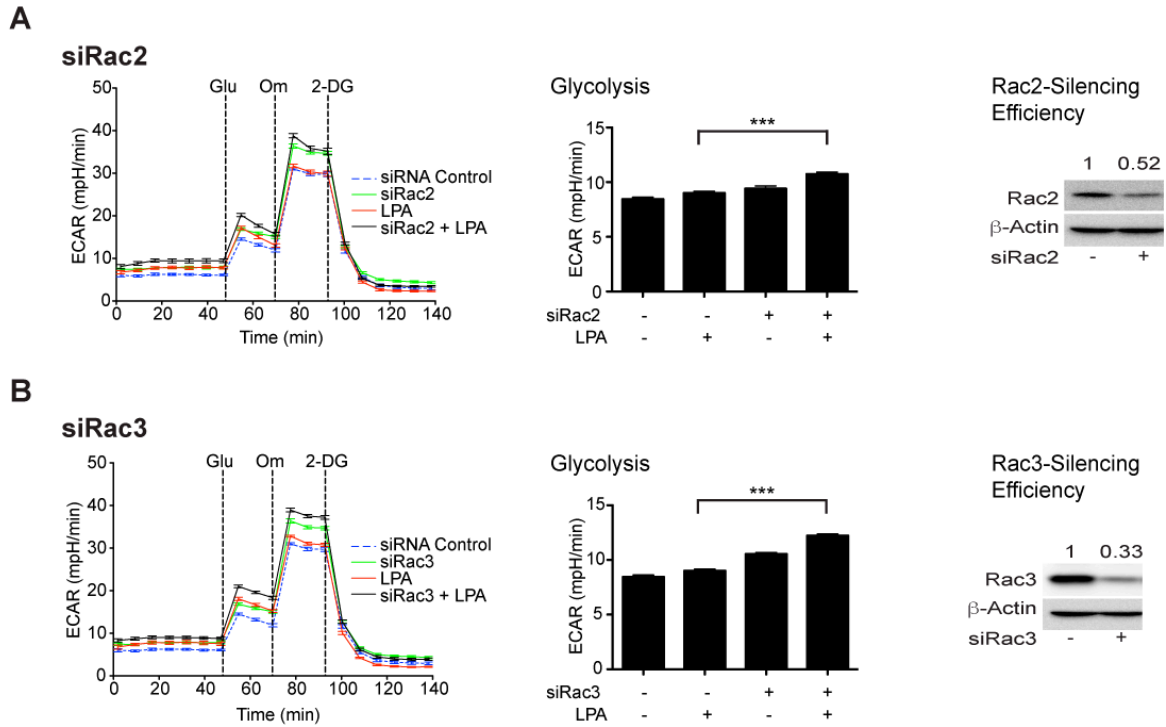

**Supplemental Figure 4. Effect of silencing Rac2 and Rac3 on LPA-stimulated aerobic glycolysis.** OVCA429 cells were transfected with either siRNAs targeting Rac2 (A) or Rac3 (B) along with non-targeting siRNA controls. Cells were stimulated with LPA (10  $\mu$ M) for 6 h. ECAR flux over time and glycolytic rate were plotted. The results are from a representative analysis (n = 3). Error bars represent mean and SEM (n = 9 parallel determinations). Statistical significance was determined by Student's t test (\*\*\*)  $P < 0.0005$ ). Silencing of the Rac2 and Rac3 by the respective siRNAs were monitored by immunoblot analysis using antibodies to Rac2 and Rac3. Immunoreactive bands were quantified and the quantified expression values for Rac 2 and Rac3 are presented above the respective bands.
