# Supplementary material
Source: PubMed Central journal article supplement (PMC5899640)
Supplement: NIHMS939867-supplement-5.pdf [file NIHMS939867-supplement-5.pdf]

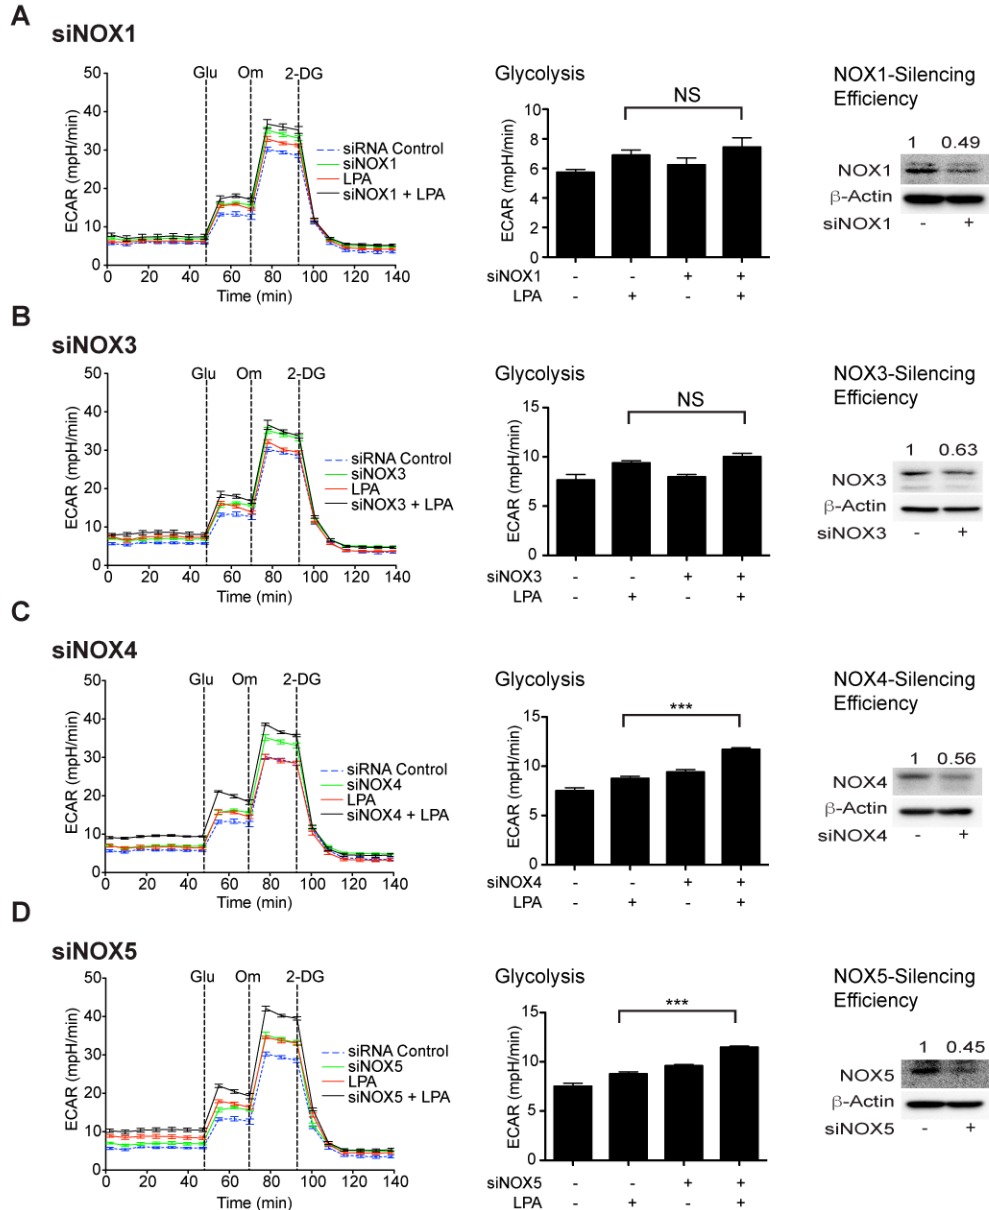

**Supplemental Figure 5. Effect of silencing NOX1, NOX3, NOX4, and NOX5 on LPA-stimulated aerobic glycolysis.** OVCA429 cells were transfected with either siRNAs targeting NOX1 (A), NOX3 (B), NOX4 (C), NOX5 (D), or with control non-targeting siRNAs. Cells were stimulated with LPA (10  $\mu$ M) for 6 h. ECAR flux analysis of the respective cells were carried out. ECAR flux over time and glycolytic rate were plotted. The results are from a representative analysis. Mean and SEM (n=3) are presented along with statistical significance as determined by Student's t test (NS: non-significant; \*\*\*P<0.0005). Silencing of the genes by the respective siRNAs was monitored by immunoblot analysis. Immunoreactive bands were quantified and the expression values are presented above the respective immunoreactive NOX-bands.
