# Supplementary material
Source: PubMed Central journal article supplement (PMC5899640)
Supplement: NIHMS939867-supplement-6.pdf [file NIHMS939867-supplement-6.pdf]

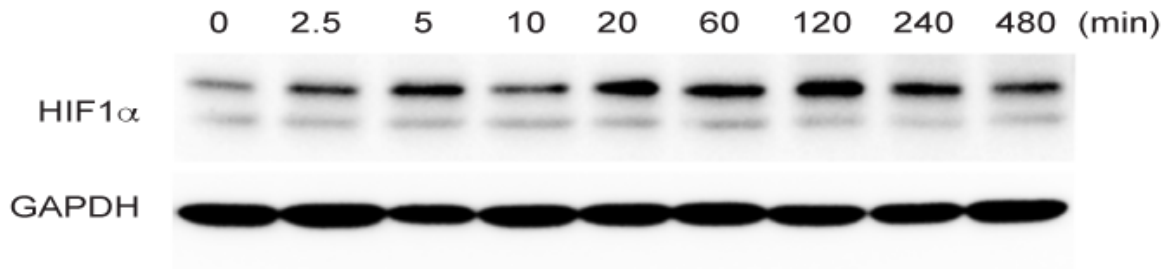

**Supplemental Figure 6. LPA-stimulated HIF1 $\alpha$  is an early response.** SKOV3-ip cells were stimulated with LPA (10  $\mu$ M) and collected at the indicated time points. Cells were lysed and the lysates were subjected to immunoblot analysis using HIF1 $\alpha$ -antibodies. The blot was stripped and re-probed with GAPDH to monitor the equal loading of protein lysates. Results from a typical experiment (n = 3) is presented.
